# Supplementary material for: Correction of the Splicing Defect Caused by a Recurrent Variant in ABCA4 (c.769-784C>T) That Underlies Stargardt Disease
Source: MDPI journal article supplement (doi:10.3390/cells11243947), 2022-12-07
Supplement: s1 [file s1]

**Supplementary Figure S1. Sequence analysis of the resulting RT-PCR products from rescue experiments of the deep-intronic variants c.769-784C>T causing insertion of pseudoexon.** Sanger sequencing chromatograms from splicing correction experiments targeting c.769-784C>T. **A)** Sequencing results in HEK293T-midigene system: sequences of the correct transcript from wild-type *ABCA4* midigene condition (i), sequences of the correct transcript from mutant *ABCA4* midigene condition (ii), sequences of the PE transcript from mutant *ABCA4* midigene condition (iii), AON-corrected transcript in mutant *ABCA4* midigene condition (iv) and mutant transcript in AON-treated *ABCA4* midigene (v) are shown. **B)** Sequencing results in fibroblasts: sequences of the correct *ABCA4* transcript from control fibroblasts condition (i), sequences of the PE *ABCA4* transcript from patient-derived fibroblasts condition (ii), AON-corrected transcript from patient-derived fibroblasts condition (iii), mutant transcript from AON-treated patient-derived fibroblasts condition (iv), AON artifact (v), cycloheximide artifact (vi). **C)** Sequencing results in photoreceptor precursor cells: sequences of the correct *ABCA4* transcript from control PPC condition (i), sequences of the PE *ABCA4* transcript from patient-derived PPCs condition (ii), AON-corrected transcript in patient-derived PPCs condition (iii), mutant transcript in AON-treated in patient-derived PPCs condition (iv).

#### A. Sequencing results HEK-midigene system

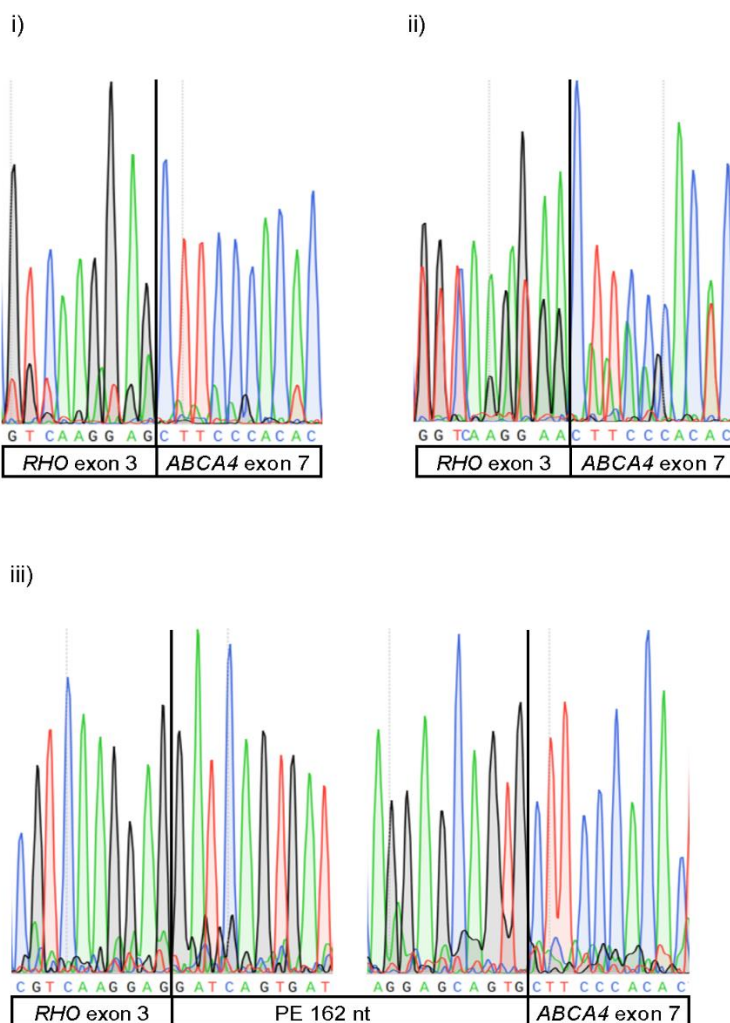

iv)

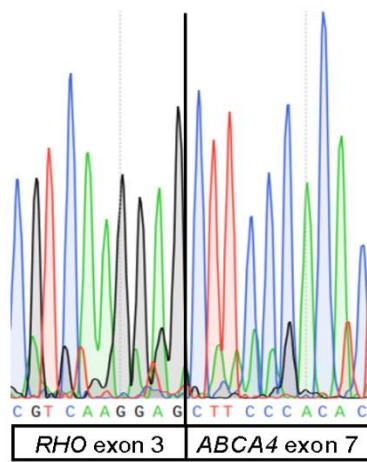

v)

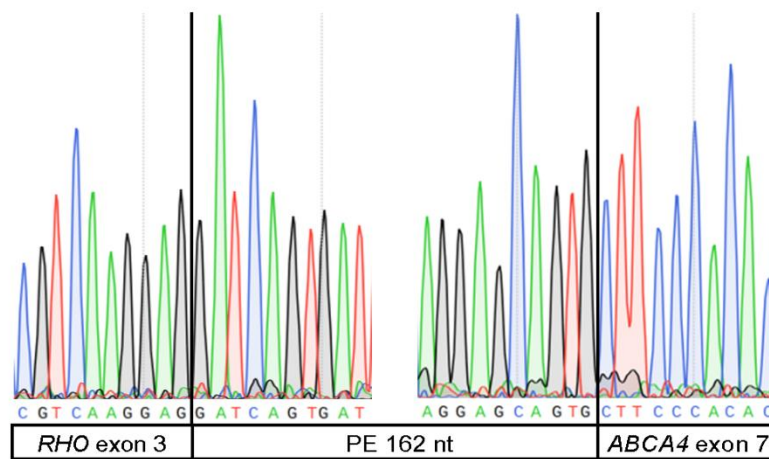

## B. Sequencing results fibroblasts

i)

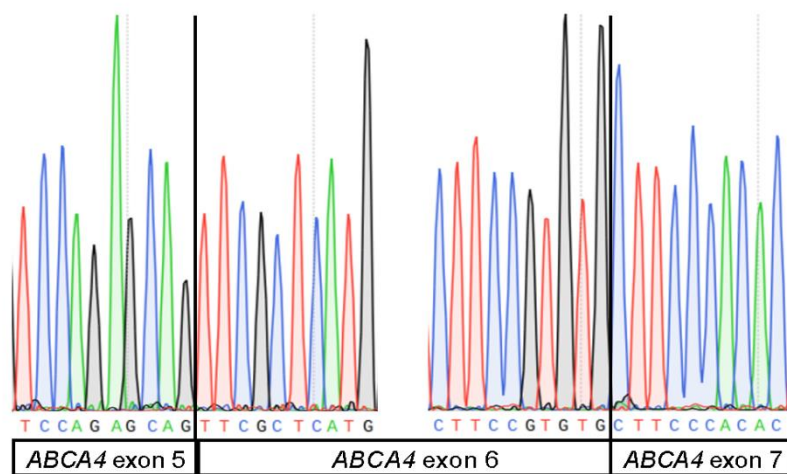

ii)

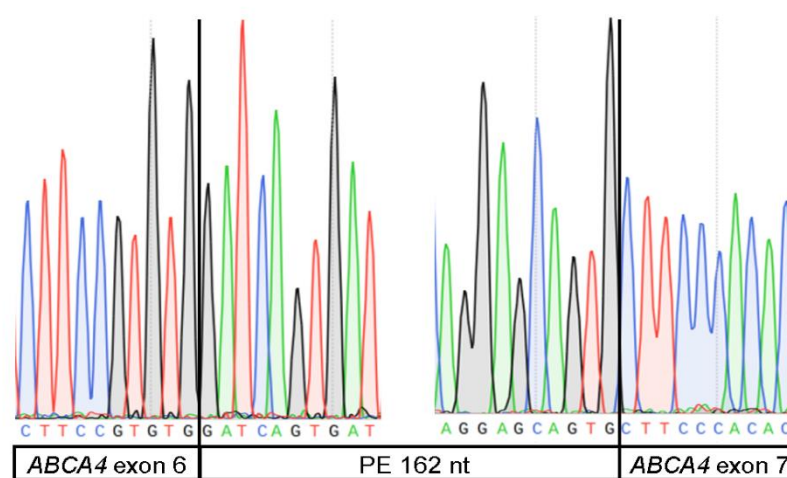

iii)

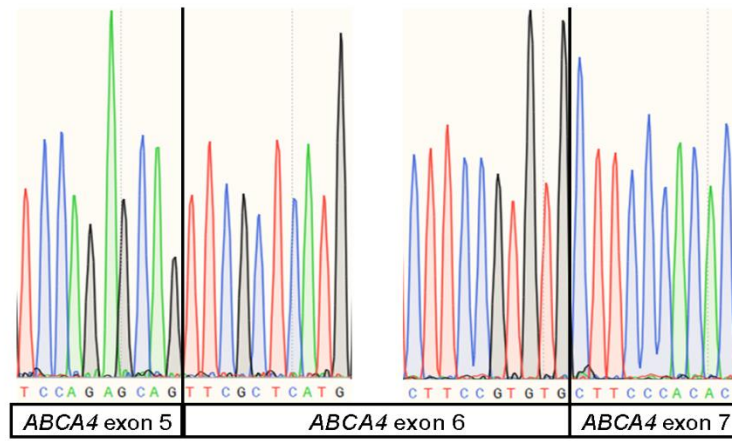

iv)

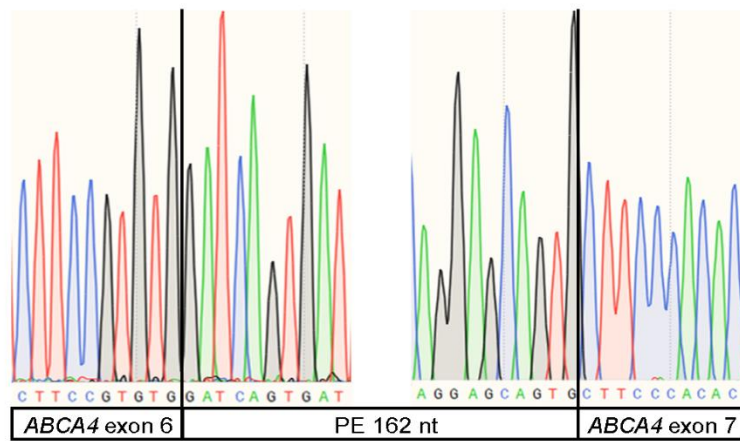

v)

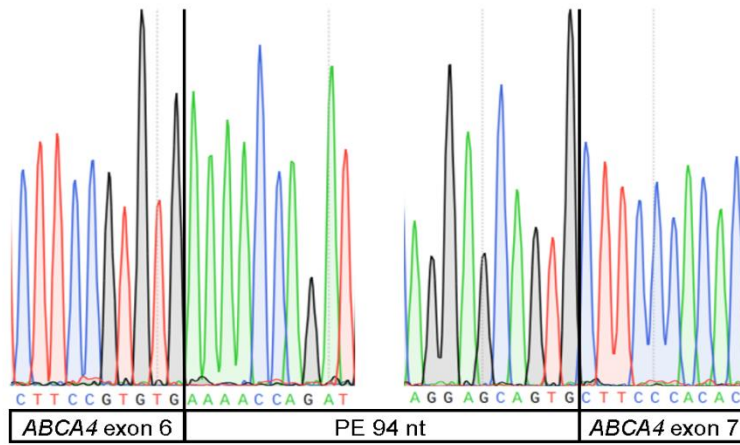

vi)

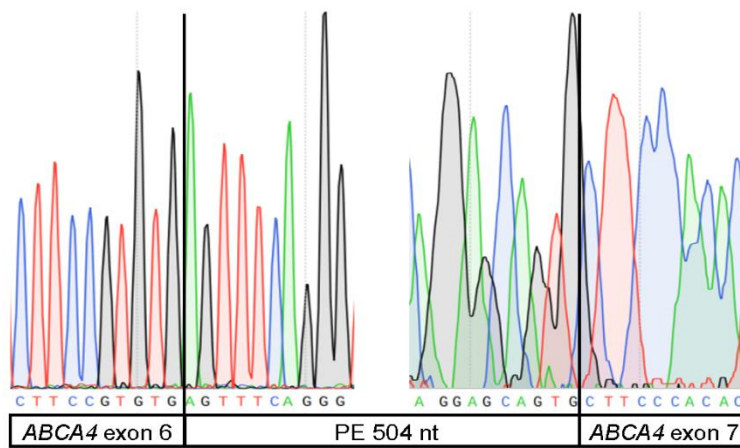

### C. Sequencing results photoreceptor precursor cells

i)

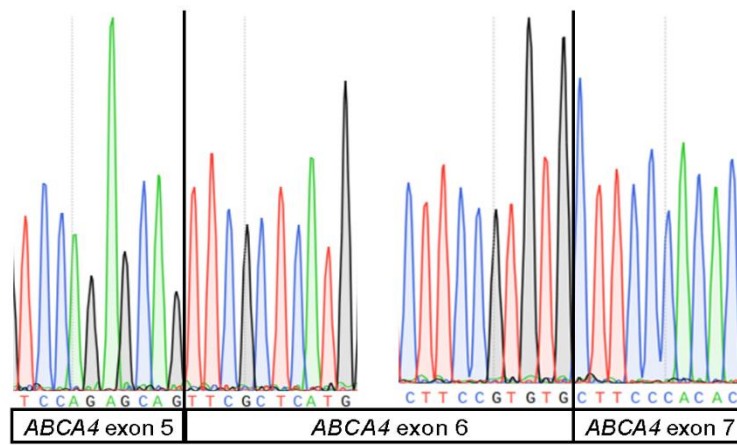

ii)

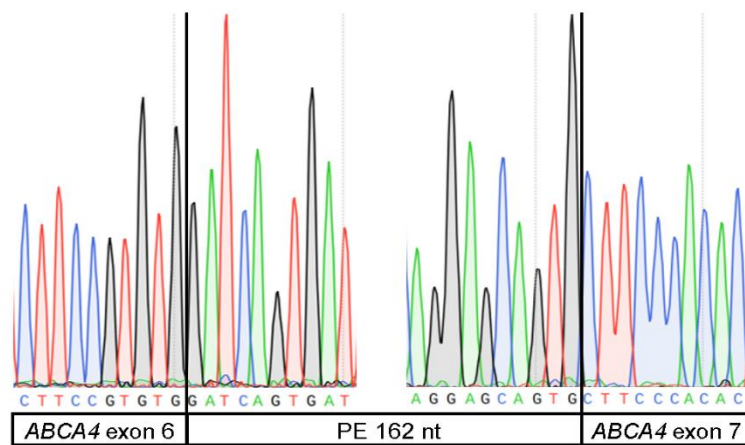

iii)

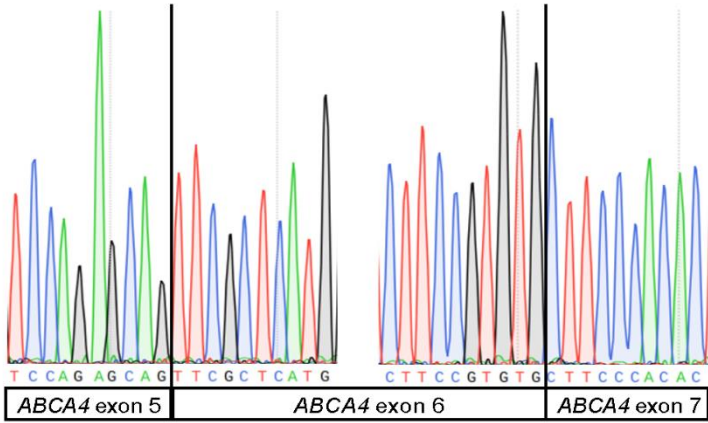

iv)

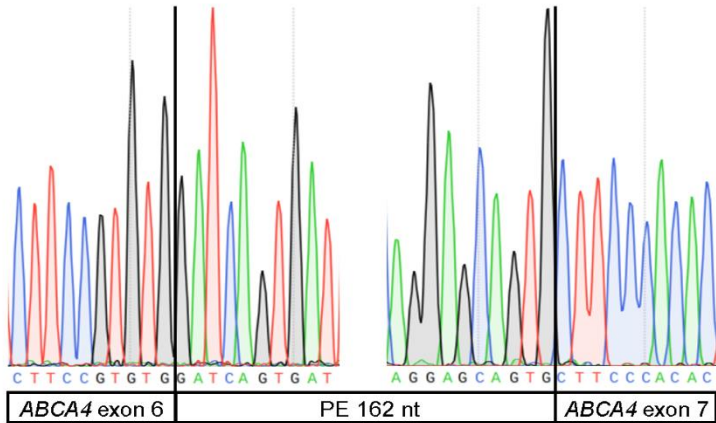



**Supplementary Figure S2. AON-based rescue for the deep-intronic c.769-784C>T variant in patient-derived fibroblasts.** The nine AONs and SON were tested in patient-derived fibroblasts. AONs and SON were transfected to patient-derived fibroblasts carrying the c.769-784C>T variant and were labelled from A1 to SON. Cycloheximide was used for cells labelled '+' and in all cells to which AONs and SON were transfected. The '-' indicates lack of cycloheximide treatment. The AON-not transfected control (CON) and patient-derived fibroblasts were used as a reference point for splicing-correction. MQ shows the negative control of the PCR reaction and amplification of exon 3 – exon 4 of *ACTB* gene was used as a loading control. **A)** In replicate 1 the PE band is stronger in the cycloheximide not treated control sample than in cycloheximide treated control. The PE band is weaker than expected in SON treated sample. AON-artifact is observed in sample treated with AON3. **B)** AON-artifact is observed in sample treated with AON1.

A. Antisense oligonucleotides screen in patient-derived fibroblasts, replicate 1

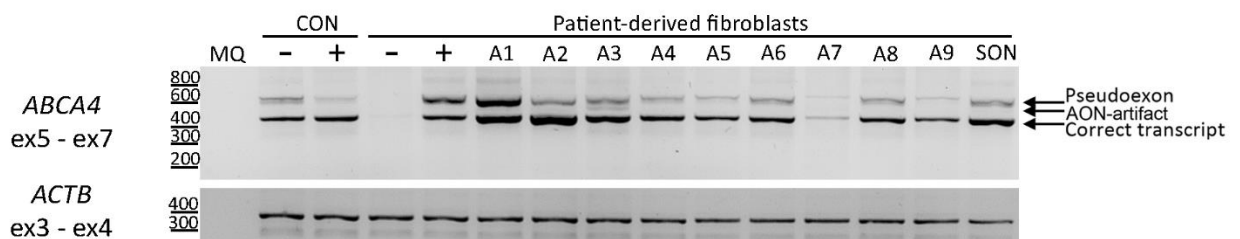

B. Antisense oligonucleotides screen in patient-derived fibroblasts, replicate 3

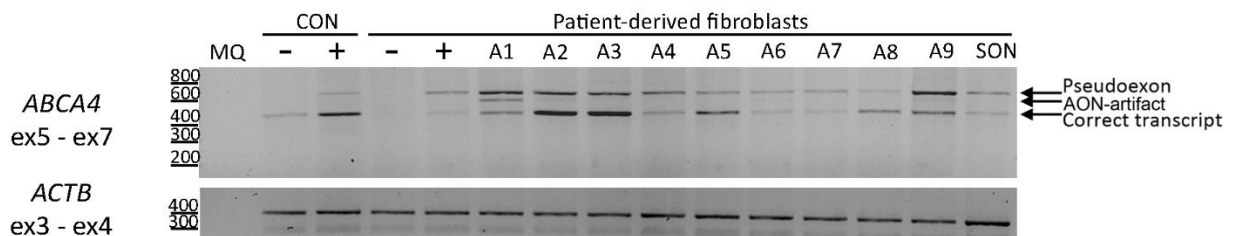



**Supplementary Figure S3. AON-based rescue for the deep-intronic c.769-784C>T variant control-derived fibroblasts. A&B)** Four AONs and SON were tested in control-derived fibroblasts. AONs and SON were transfected to control-derived fibroblasts and were labelled from A2, A5, A7, A9 and SON. Cycloheximide was used for cells labelled '+' and in all cells to which AONs and SON were transfected. The '-' indicates lack of cycloheximide treatment. The AON-not transfected control (CON) and patient-derived fibroblasts (PAT) were used as a reference point for splicing-correction. **C)** The graph represents the semi-quantification of the resulting RT-PCR products, showing the % of correct and pseudoexon (PE) inclusion transcript. Statistically significant PE exclusion was achieved for all four AONs. Milli-Q water (MQ) shows the negative control of the PCR reaction and amplification of exon 3 – exon 4 of *ACTB* gene was used as a loading control. Data (n=2) are presented as mean±SD and compared to the AON-untreated condition (\*p<0.05, \*\*p<0.01, \*\*\*p<0.001, \*\*\*\*p<0.0001).

#### A. Replicate 1 of AONs screen in control fibroblasts

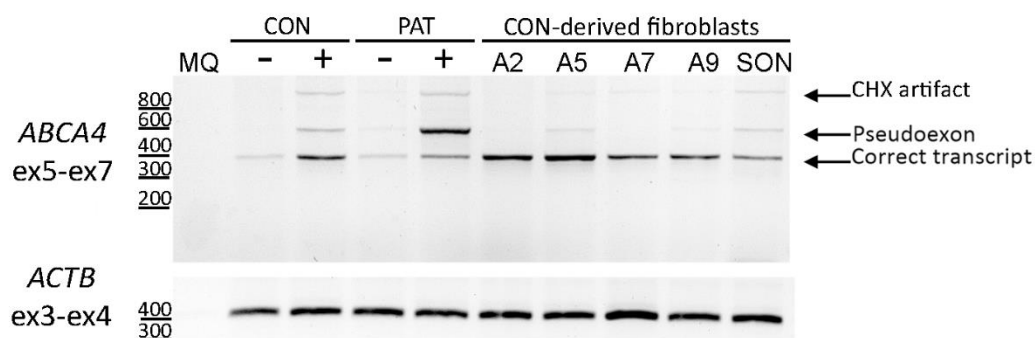

#### B. Replicate 2 of AONs screen in control fibroblasts

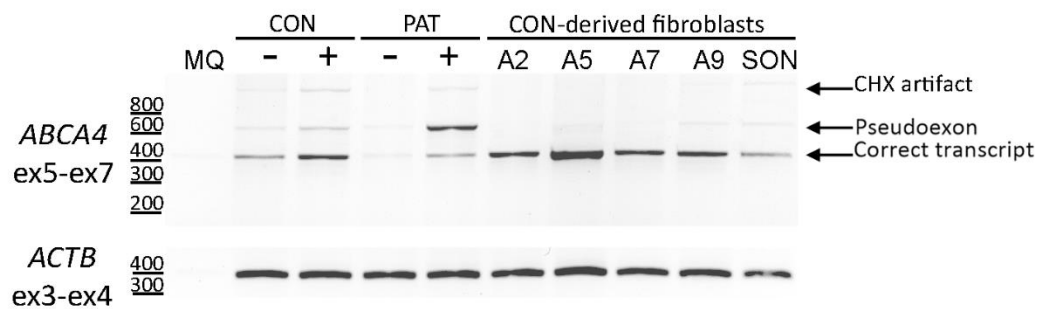

#### C. Average semi-quantification

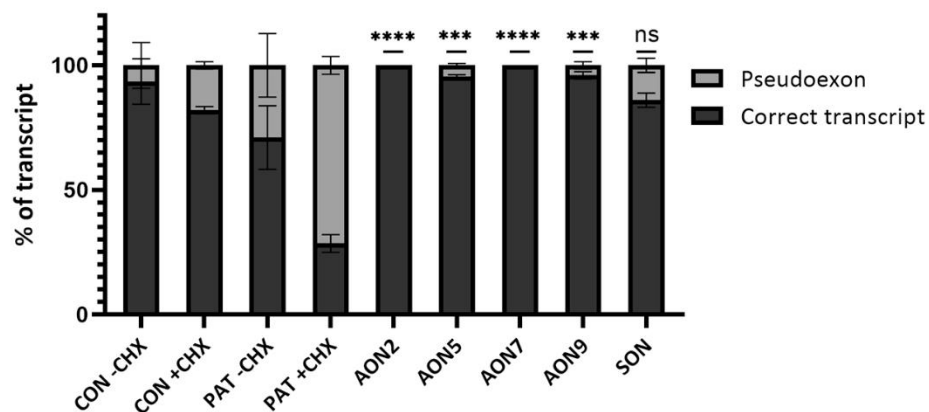

**Supplementary Figure S4. Relative pluripotency and retinal gene expression profiles of photoreceptor precursor cells.** Average gene expression profile of control iPSC differentiation for replicate 1 and 2. The abbreviations under each graph represents; wild-type induced pluripotent stem cells in black (WT iPS), wild-type photoreceptor precursor cells in grey (WT PPC), mutant carrying *ABCA4* c.769-784C>T variant in induced pluripotent stem cells in magenta (MT iPS) and mutant carrying *ABCA4* c.769-784C>T variant in photoreceptor precursor cells in orange (MT PPC) **(A)**. Strong increase in expression was observed in early retina marker such as *PAX6* and with retina specific genes such as *ABCA4*. The expression of pluripotency markers *OCT3/4* and *OTX* were decreased as the cells acquired more retina like phenotype. The remaining retinal gene markers had variable expression. **B)** Average gene expression profile of patient-derived differentiation for replicate 1 and 2 showing the relative gene expression of differentiated PPCs relative to iPSC. An increase in expression was observed in early retina marker such as *PAX6* and with retina specific genes such as *ABCA4*. Other retinal markers were also increased such as *RCV1*, *RPE65* and *VMD2*. The expression of pluripotency markers *OCT3/4* and *OTX* were decreased as the cells acquired more retina like phenotype. The remaining retinal gene markers had variable expression.

**A. Pluripotency and retinal gene expression in *ABCA4* wild-type rep1&2**

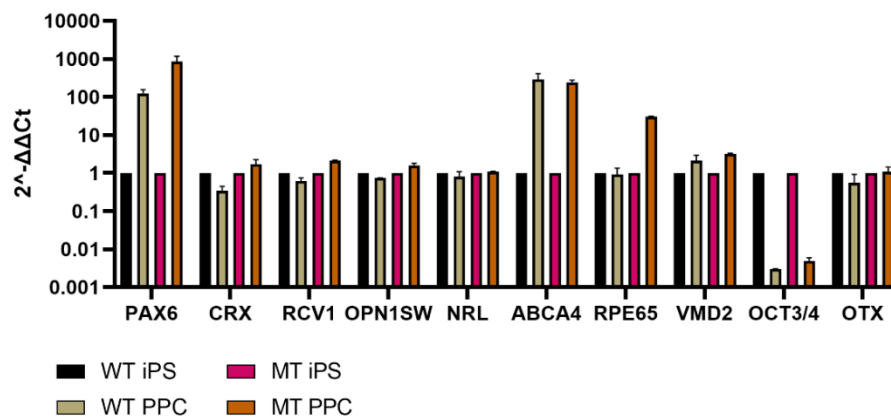

**B. Pluripotency and retinal gene expression in *ABCA4* c.769-784C>T rep1&2**

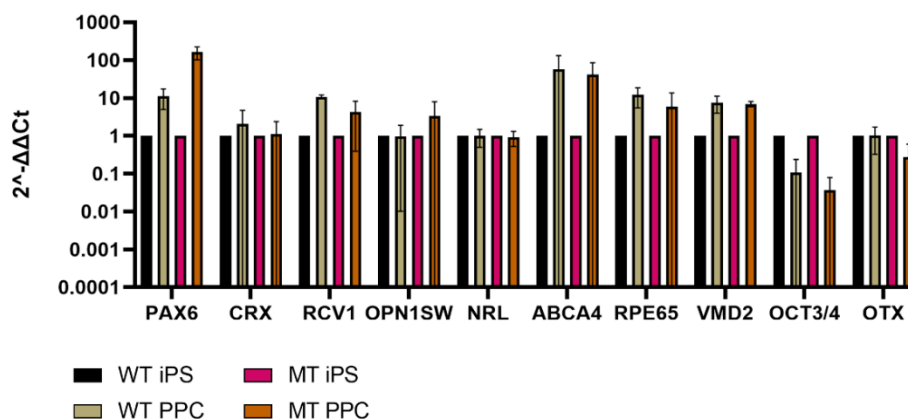

**Supplementary Table S1. Primers for reverse transcription-PCR analysis and qPCR.**

| List of primers       |                          |                       |                          |        |
|-----------------------|--------------------------|-----------------------|--------------------------|--------|
| Forward Primer        |                          | Reverse Primer        |                          | Use    |
| Gene                  | Sequence 5' -> 3'        | Gene                  | Sequence 5' -> 3'        |        |
| <i>RHO</i> _exon3     | CGGAGGTCAACAACGAGTCT     | <i>ABCA4</i><br>exon7 | CTTGAATTCTTGGTGACATATCAG | RT-PCR |
| <i>RHO</i> _exon5     | ATCTGCTGCGGCAAGAAC       | <i>RHO</i> _exon5     | AGGTGTAGGGGATGGGAGAC     |        |
| <i>ABCA4</i><br>exon5 | GGAATACGAATAAGGGATATCTTG | <i>ABCA4</i><br>exon7 | CTTGAATTCTTGGTGACATATCAG |        |
| <i>ACTB</i> _exon3    | ACTGGGACGACATGGAGAAG     | <i>ACTB</i> _exon4    | TCTCAGCTGTGGTGGTGAAG     |        |
| <i>GUSB</i>           | AGAGTGGTGCTGAGGATTGG     | <i>GUSB</i>           | CCCTCATGCTCTAGCGTGTC     | qPCR   |
| <i>ABCA4</i>          | CATCCTGTTCCACCACCTCA     | <i>ABCA4</i>          | CTGTGTCCTCCAACATGGCT     |        |
| <i>CRX</i>            | CCCCAGTGTGGATCTGATG      | <i>CRX</i>            | CAACAGTGCCTCCAGCTC       |        |
| <i>NRL</i>            | GGCTCCACACCTTACAGCTC     | <i>NRL</i>            | AGCCAGTACAGCTCCTCCAG     |        |
| <i>OCT3/4</i>         | GTTCTTCATTCACTAAGGAAGG   | <i>OCT3/4</i>         | CAAGAGCATCATTGAACCTCAC   |        |
| <i>OPN1SW</i>         | TGGTATTGGCGTCTCCATC      | <i>OPN1SW</i>         | ACTCGCTGCGGTATTTGG       |        |
| <i>OTX2</i>           | TATCTTAAGCAACCGCCTTACG   | <i>OTX2</i>           | GGAGGGGTGCAGCAAGTC       |        |
| <i>PAX6</i>           | GCTGCAAAGAAATAGAACATCC   | <i>PAX6</i>           | TTGGCTGCTAGTCTTTCTCG     |        |
| <i>RCV1</i>           | ACACCAAGTTCTCGGAGGAG     | <i>RCV1</i>           | ACTTGGCGTAGATGCTCTGG     |        |
| <i>RPE65</i>          | TTACTACGCTTGACAGAGACC    | <i>RPE65</i>          | GCCCCATTGACAGAGACATAG    |        |
| <i>VMD2</i>           | TCAGTGTGGACACCTGTATGC    | <i>VMD2</i>           | AAGCTGTACACCGCCACAG      |        |

**Supplementary Table S2. Averaged semi-quantification analysis of transcripts from RT-PCR products from HEK293T-midigene screen, control and patient-derived fibroblasts screen and control and patient-derived PPC screen.** The quantity of the different transcripts is represented as an averaged percent (%) of the total transcript for each condition or lane. SD: standard deviation.

|                    | HEK293T-midigene MT screen |    |     |       |      |    |      |    |      |       |      |       |      |    |      |    |      |    |      |       |      |    |     |       |
|--------------------|----------------------------|----|-----|-------|------|----|------|----|------|-------|------|-------|------|----|------|----|------|----|------|-------|------|----|-----|-------|
| Condition          | WT                         |    | MT  |       | AON1 |    | AON2 |    | AON3 |       | AON4 |       | AON5 |    | AON6 |    | AON7 |    | AON8 |       | AON9 |    | SON |       |
|                    | %                          | SD | %   | SD    | %    | SD | %    | SD | %    | SD    | %    | SD    | %    | SD | %    | SD | %    | SD | %    | SD    | %    | SD | %   | SD    |
| Correct transcript | 100%                       | 0  | 79% | 0.069 | 100% | 0  | 100% | 0  | 91%  | 0.053 | 90%  | 0.074 | 100% | 0  | 100% | 0  | 100% | 0  | 93%  | 0.054 | 100% | 0  | 73% | 0.016 |
| PE inclusion       | 0%                         | 0  | 21% | 0.069 | 0%   | 0  | 0%   | 0  | 9%   | 0.053 | 10%  | 0.074 | 0%   | 0  | 0%   | 0  | 0%   | 0  | 7%   | 0.054 | 0%   | 0  | 27% | 0.016 |

|                    | Patient-derived fibroblasts MT screen |          |           |          |          |    |          |          |      |          |      |          |      |          |      |          |      |          |      |          |      |          |      |          |      |          |     |          |   |
|--------------------|---------------------------------------|----------|-----------|----------|----------|----|----------|----------|------|----------|------|----------|------|----------|------|----------|------|----------|------|----------|------|----------|------|----------|------|----------|-----|----------|---|
| Condition          | CONT -CHX                             |          | CONT +CHX |          | PAT -CHX |    | PAT +CHX |          | AON1 |          | AON2 |          | AON3 |          | AON4 |          | AON5 |          | AON6 |          | AON7 |          | AON8 |          | AON9 |          | SON |          |   |
|                    | %                                     | SD       | %         | SD       | %        | SD | %        | SD       | %    | SD       | %    | SD       | %    | SD       | %    | SD       | %    | SD       | %    | SD       | %    | SD       | %    | SD       | %    | SD       | %   | SD       |   |
| Correct transcript | 88                                    | 0.203335 | 87        | 0.023401 | 100      | 0  | 35       | 0.114734 | 40   | 0.132073 | 78   | 0.125521 | 73   | 0.05148  | 51   | 0.228015 | 80   | 0.065079 | 51   | 0.167247 | 64   | 0.303136 | 77   | 0.053773 | 69   | 0.290877 | 48  | 0.212768 |   |
| AON-artifact       | 0                                     | 0        | 0         | 0        | 0        | 0  | 0        | 0        | 9    | 0.107319 | 0    | 0        | 1    | 0.015389 | 1    | 0.014779 | 0    | 0        | 0    | 0        | 0    | 0        | 0    | 0        | 0    | 0        | 0   | 0        | 0 |
| PE inclusion       | 12                                    | 0.203335 | 13        | 0.023401 | 0        | 0  | 65       | 0.114734 | 51   | 0.025342 | 22   | 0.125521 | 27   | 0.057593 | 48   | 0.223532 | 20   | 0.065079 | 49   | 0.167247 | 36   | 0.303136 | 23   | 0.053773 | 31   | 0.290877 | 52  | 0.212768 |   |

| Patient-derived fibroblasts WT screen |           |       |           |       |          |       |          |       |      |    |      |       |      |    |      |       |     |       |
|---------------------------------------|-----------|-------|-----------|-------|----------|-------|----------|-------|------|----|------|-------|------|----|------|-------|-----|-------|
| Condition                             | CONT -CHX |       | CONT +CHX |       | PAT -CHX |       | PAT +CHX |       | AON2 |    | AON5 |       | AON7 |    | AON9 |       | SON |       |
|                                       | %         | SD    | %         | SD    | %        | SD    | %        | SD    | %    | SD | %    | SD    | %    | SD | %    | SD    | %   | SD    |
| Correct transcript                    | 93        | 0.093 | 81        | 0.004 | 43       | 0.298 | 27       | 0.038 | 100  | 0  | 95   | 0.001 | 100  | 0  | 96   | 0.023 | 87  | 0.016 |
| PE inclusion                          | 7         | 0.093 | 19        | 0.004 | 57       | 0.298 | 73       | 0.038 | 0    | 0  | 5    | 0.001 | 0    | 0  | 4    | 0.023 | 13  | 0.016 |

| Patient-derived PPC WT screen |           |    |           |       |          |      |          |       |             |       |           |       |             |       |           |       |             |       |           |       |          |       |
|-------------------------------|-----------|----|-----------|-------|----------|------|----------|-------|-------------|-------|-----------|-------|-------------|-------|-----------|-------|-------------|-------|-----------|-------|----------|-------|
| Condition                     | CONT -CHX |    | CONT +CHX |       | PAT -CHX |      | PAT +CHX |       | AON2@0.5 μM |       | AON2@1 μM |       | AON5@0.5 μM |       | AON5@1 μM |       | AON7@0.5 μM |       | AON7@1 μM |       | SON 1@μM |       |
|                               | %         | SD | %         | SD    | %        | SD   | %        | SD    | %           | SD    | %         | SD    | %           | SD    | %         | SD    | %           | SD    | %         | SD    | %        | SD    |
| Correct transcript            | 100%      | 0  | 95%       | 0.013 | 85%      | 0.02 | 70%      | 0.003 | 97%         | 0.002 | 97%       | 0.015 | 97%         | 0.003 | 95%       | 0.006 | 97%         | 0.002 | 97%       | 0.004 | 96%      | 0.008 |
| PE inclusion                  | 0%        | 0  | 5%        | 0.013 | 15%      | 0.02 | 30%      | 0.003 | 3%          | 0.002 | 3%        | 0.015 | 3%          | 0.003 | 5%        | 0.006 | 3%          | 0.002 | 3%        | 0.004 | 4%       | 0.008 |

| Patient-derived PPC MT screen |           |    |           |       |          |       |          |       |             |       |           |       |             |       |           |       |             |       |           |       |          |       |
|-------------------------------|-----------|----|-----------|-------|----------|-------|----------|-------|-------------|-------|-----------|-------|-------------|-------|-----------|-------|-------------|-------|-----------|-------|----------|-------|
| Condition                     | CONT -CHX |    | CONT +CHX |       | PAT -CHX |       | PAT +CHX |       | AON2@0.5 μM |       | AON2@1 μM |       | AON5@0.5 μM |       | AON5@1 μM |       | AON7@0.5 μM |       | AON7@1 μM |       | SON 1@μM |       |
|                               | %         | SD | %         | SD    | %        | SD    | %        | SD    | %           | SD    | %         | SD    | %           | SD    | %         | SD    | %           | SD    | %         | SD    | %        | SD    |
| Correct transcript            | 100%      | 0  | 97%       | 0.015 | 84%      | 0.056 | 66%      | 0.058 | 95%         | 0.024 | 92%       | 0.034 | 79%         | 0.009 | 81%       | 0.077 | 95%         | 0.017 | 97%       | 0.005 | 74%      | 0.025 |
| PE inclusion                  | 0%        | 0  | 3%        | 0.015 | 16%      | 0.056 | 34%      | 0.058 | 5%          | 0.024 | 8%        | 0.034 | 21%         | 0.009 | 19%       | 0.077 | 5%          | 0.17  | 3%        | 0.005 | 26%      | 0.025 |
